# Supplementary material
Source: PubMed Central journal article supplement (PMC3127934)
Supplement: 1106630108_pnas.1106630108_SI.pdf [file 1106630108_pnas.1106630108_SI.pdf]

# Supporting Information

Flynn et al. 10.1073/pnas.1106630108

## SI Materials and Methods

**Lentiviral Infection and Total RNA Preparation.** For Lentivirus production, 293T cells were plated in six-well dishes at  $6 \times 10^5$  cells/well. Forty-eight hours after cotransfection of viral and shRNA plasmids into 293T cells, lentivirus was harvested and used directly to infect mESCs in a six-well plate at  $2 \times 10^5$  cells/well. The infection media was 1:2, viral media: mESC media with 2 mM polybrene. Infected mESCs were then selected for 24 hours with 2  $\mu$ M puromycin. Total RNA was collected using the RiboPure Kit (Ambion/Applied Biosystems) according to the manufacturer's protocol.

**RT-qPCR of RNA Transcripts.** All other qPCR experiments were performed with *Power SYBR Green PCR Master Mix* (Applied Biosystems). Primers to detect uaRNAs, promoter RNAs, spliced mRNA (exon 1-2 junction, probe), and nascent mRNA (exon1-intron1, probe) are shown in Table S3. Analysis of relative transcript levels was calculated using the delta-delta Ct method. Once internal controls of  $\beta$ -Actin, GAPDH, and 28S rRNA were shown to be comparable standards,  $\beta$ -Actin was chosen as the internal control for all experiments. Error between biological replicates was calculated using SEM. Statistical significance was determined using a two-tailed, paired *t* test. *P*-values of  $<0.05$  were reported for all RT-qPCR analysis.

Standard curves (for absolute quantification of uaRNAs) were generated with qPCR using uaRNA-specific primers to amplify ssDNA Ultramer Oligonucleotides. mESCs were collected, counted using a Coulter Counter (Millipore), and total RNA was prepared to determine average RNA concentration per mESC. A quantified number of cells were subjected to qPCR using the uaRNA primer pairs and resulting qPCR signal was converted to copy number based on the ssDNA molar equivalents.

**Rapid Amplification of 5' Complementary DNA Ends (5'-RACE).** The following modifications were made to the FirstChoice RLM-RACE Kit (Ambion). First, T4 RNA Ligase 1 (ssRNA Ligase) was heat-inactivated for 15 minutes at 65  $^{\circ}$ C. Second, SuperScript III (SSIII, Invitrogen) was used for cDNA synthesis according to the manufacturer's protocol. Reverse transcription was performed with a target-specific primer, gsp1, at a 0.25  $\mu$ M final con-

centration. In addition, two subsequent nested PCR reactions using HotStarTaq (Qiagen) was performed with two forward primers,  $P_o$  and  $P_i$ , 5'-RACE adaptor-specific primers (Ambion), and two reverse target-specific primers, gsp-2 and gsp-3, at a 0.4  $\mu$ M final concentration (Table S4). PCR 1 and PCR 2 were amplified for 20 and 25 to 30 cycles, respectively. PCR reaction products were run on a 2% agarose gel, extracted using a QIAquick Gel Extraction Kit (Qiagen), and sequenced using Sanger methods.

**Rapid Amplification of 3' Complementary DNA Ends (3'-RACE).** Large fractionated RNA (5  $\mu$ g) was DNase-treated with the Turbo DNA-Free Kit (Ambion). The ligation reaction was performed with a 3'-RACE adaptor, synthesized with a 5'-phosphate and a 3'-dideoxy-C (IDT) (Table S5) and used at a final 50  $\mu$ M concentration for 3' end ligation. All primers for 3'-RACE are listed in Table S5. Reverse transcription was modified in the following manner: the SSIII protocol for GC-Rich templates was used in place of the standard and reverse transcription was performed with an adaptor-specific primer, 3'-RACE  $P_o$ , at 0.25  $\mu$ M final concentration. Two subsequent PCR reactions were performed similarly as 5'-RACE, but instead with two forward target-specific primers, gsp-1 and gsp-2, and two reverse adaptor-specific primers 3'-RACE  $P_o$  and  $P_i$ .

**Flavopiridol and Doxorubicin Treatment of mESCs.** Flavopiridol was added directly to the mESC culture media to a final concentration of 1  $\mu$ M and allowed to incubate for 1, 5, 10, 15, 30, and 60 min in a tissue culture incubator at 37  $^{\circ}$ C. For the wash-off experiments, flavopiridol treated mESCs were washed once with 37  $^{\circ}$ C 1 $\times$  Phosphate Buffered Saline. Fresh mESC media was added to the flavopiridol treated mESCs and they were placed at 37  $^{\circ}$ C for 30, 60, or 90 min before total RNA was isolated as described above. Doxorubicin was added directly to the mESC culture media to a final concentration of 1  $\mu$ M and incubated for 1.5, 4, or 6 h at 37  $^{\circ}$ C. After the specified time, RNA was isolated as previously described and RT-qPCR was performed to assay transcript levels.









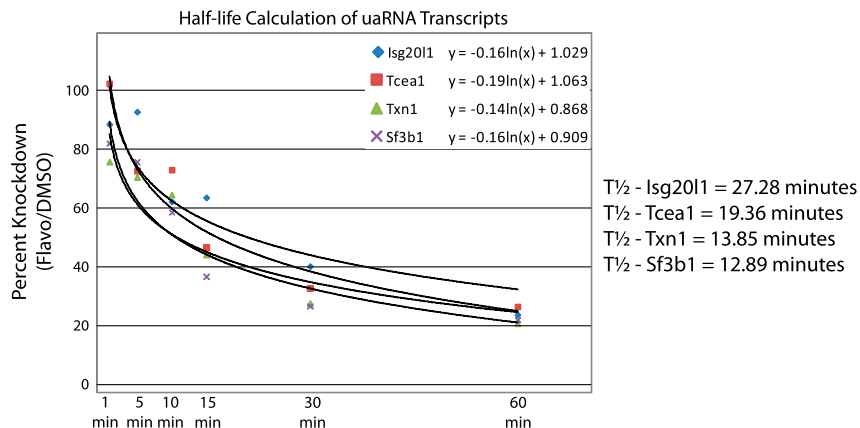

**Fig. S7.** uaRNA half-life calculations. Scatter plot of the relative uaRNA transcript abundances over a one hour flavopiridol treatment. For each gene, a best fit logarithmic curve was determined and equations corresponding to each gene are shown in the upper right-hand corner. Using the equations above, half-lives were calculated and shown for each gene to the right.

**Table S1.** Taqman primers and shRNAs used for mRNA knockdown

| Gsym, Complex   | Accession ID | Open Biosystems shRNA ID | Applied Biosystems Expression Assay |
|-----------------|--------------|--------------------------|-------------------------------------|
| Supt4h, DSIF    | NM_009296    | RMM4534-NM_009296        | Mm02527263_g1                       |
| Supt5h, DSIF    | NM_013676    | RMM4534-NM_013676        | Mm01170629_m1                       |
| NELF-E, NELF    | NM_138580    | RMM4534-NM_138580        | Mm01134804_m1                       |
| NELF-A, NELF    | NM_011914    | RMM4534-NM_011914        | Mm01217228_m1                       |
| Exosc5, Exosome | NM_138586    | RMM4534-NM_138586        | Mm00506830_m1                       |
| GAPDH           | NM_008084.2  | N/A                      | 4352932E                            |

**Table S2.** ssDNA ultramer oligonucleotides for absolute copy number determination

|         | Sequence (5'-3')                                                                                                                                                                                |
|---------|-------------------------------------------------------------------------------------------------------------------------------------------------------------------------------------------------|
| lsg2011 | TTATTTACAGGACTTCTCACAAACCCCAAGCCTGGAGGGGCTGCAGTTCCTCCGA<br>GGCAGATCGGGATGTGCTCTTTGAGGCTTTAAGTCTTTGAAGTTGCGGTTCACTAGGCGTCGGGT                                                                    |
| Tcea1   | TGCTCATGCGCTTTAAGCCCTCGGCAATGCCTGTCTGCGTCCCAGAGAACGCT<br>CTGCCGGAGGGTTTCGATGGAACCTGTAGCAACCTACCGCCTACTGCCTGAT<br>CCCTCTGGCGTGAAAGCCGGACTCCGTCCAACCTCCAGCTCGCCAGCAACGCGAG<br>TCCGGATAGGCCCGGAAGT |
| Txn1    | ATCTGACTTAGTCTAGTTTGGGGCATGGGCAGTGTGATTACAGAAGGACTCTA<br>CGGTGTGAGAGAGACCGTGATCTACCCCGGCGTGTTCGCTGTTAAAGTGCC<br>CTTGAGGCAGCTGGAAGT                                                              |
| Sf3b1   | GACAGGCTTTGTCTGTACAGCCCTGGCTTCGGGAACCTCTTTGTAGACCAGGC<br>TGGCCTCGAACTGCCTCTTCTCTCCGAGTGCTTGAATTAACGGCACGTTACCC<br>ACCACTGGCCGGACAGGCTACAGCCCTTGGGAAGTAGCCATCCTCTCCGCTTTT                        |

**Table S3.** Primers used in RT-qPCR for relative transcript level analysis

| Gene—Location              | Forward Primer (5' → 3') | Reverse Primer (5' → 3') |
|----------------------------|--------------------------|--------------------------|
| lsg2011—Upstream Antisense | CCTAGTGAACCGCAACCTTC     | GACTTCTCACAAACCCCAAGC    |
| lsg2011—Exon1-Exon2        | GGGTTGGTTTGCAACTAGGC     | GCTCACAGTTGGGGTAAGA      |
| lsg2011—Exon1-Intron1      | GGGTTGGTTTGCAACTAGGC     | CCCCAAAGCTTACAGACCA      |
| lsg2011—Promoter           | TGATCCTGCTCCTCCTCAGT     | AGATCGGGATGTGCTCTTTG     |
| Tcea1—Upstream Antisense   | CTATCCGGACTCGCGTTG       | CTTTAAGCCCTCGGCAATG      |
| Tcea1—Exon1-Exon2          | GATGGACAAAATGGTGCAGA     | TTCATCTGTGCTCTGCTTGC     |
| Tcea1—Exon1-Intron1        | GTTTCGATTGCCAAGAAGAT     | GCAGCACGGACCTGAAAG       |
| Tcea1—Promoter             | GATCGCAGGAGACTGGAAAG     | GGGTTTCGATGGAACCTCGTA    |
| Txn1—Upstream Antisense    | GCCTCAAGGGCACTTTAACA     | GGTCTAGTTTGGGGCATGG      |
| Txn1—Exon1-Exon2           | GCCAAAATGGTGAAGCTGAT     | TGATCATTTTGAAGGTTCCA     |
| Txn1—Exon1-Intron1         | TGGATCCATTTCCATCTGG      | CCGAGAGTGTCTCTTCAGC      |
| Txn1—Promoter              | GCTGCCGAACAAGAACCTTA     | TTGGCTCTTAGGGGTAGCTG     |
| Sf3b1—Upstream Antisense   | GCGGAAGAGGATGGCTACT      | GTCTGTACAGCCCTGGCTTC     |
| Sf3b1—Exon1-Exon2          | TGGACAAAATGGCGAAGAT      | TGCCTTCTGCTTGAATTT       |
| Sf3b1—Exon1-Intron1        | GTGGACAAAATGGCGAAGAT     | CTCGGTCGAGACCAGAGATG     |
| Sf3b1—Promoter             | TCCTAAAAAGCCAGCGAAA      | GACAGGCTACAGCCCTCTTG     |
| β-Actin mRNA               | GACGAGGCCAGAGCAAGAGAGG   | GGTGTGAAGTCTCAAACATG     |
| 28S rRNA                   | AGCAGCCGACTAGAAGCTGG     | TAGGGACAGTGGGAATCTCG     |
| GAPDH                      | GTGTTCTACCCCAATGTGT      | AATGTGATACCAGGAAATGAGCTT |

**Table S4. 5'-RACE primers**

|         | Gsp-1 (5'-3')                | Gsp-2 (5'-3')                 |
|---------|------------------------------|-------------------------------|
| Isg2011 | GCTCTTTGAGGCTTTAAGTCTTTGAAGG | CTTTGAGGCTTTAAGTCTTTGAAGGTTGC |
| Tcea1   | TAGCAACCTACCGCCTACTGCC       | CTACCGCCTACTGCCTGATCC         |
| Txn1    | GTGCCCTTGAGGCAGCTGGAAGTTGG   | CCTTGAGGCAGCTGGAAGTTGGCTC     |
| Sf3b1   | GGACAGGCTACAGCCCTCTGG        | CTACAGCCCTCTTGGGAAGTAGC       |
|         | Gsp-3 (5'-3')                |                               |
| Isg2011 | GAGGCTTTAAGTCTTTGAAGTTGCGG   |                               |
| Tcea1   | CTCTGGCGTAAAAGCCGGACTCC      |                               |
| Txn1    | GAGGCAGCTGGAAGTTGGCTCTTAGG   |                               |
| Sf3b1   | CAGCCCTCTTGGGAAGTAGCCATCC    |                               |

**Table S5. 3'-RACE primers and adaptor sequence**

|                  | Gsp-1 (5'-3')                                                         | Gsp-2 (5'-3')              |
|------------------|-----------------------------------------------------------------------|----------------------------|
| Isg2011          | CGACGCCTAGTGAACCGCAACC                                                | ACCGCAACCTTCAAAGACTTAAAGCC |
| Tcea1            | ACGGAGTCCGGCTTTCACGCCAGAG                                             | GGAGTCCGGCTTTCACGCCAGAG    |
| Txn1             | GGCAGTACCCTAAGAGCC                                                    | CCTAAGAGCCAACCTCCAGCTGCC   |
| Sf3b1            | CGCGGAAGAGGATGGCTACTTCC                                               | CCAAGAGGGCTGTAGCCTGTCC     |
| Po               | CGACTACCGCTACTTACTTGTGAC                                              |                            |
| Pi               | CTTGTGACGCAAACGACCGAAACTAC                                            |                            |
| Adaptor Sequence | 5'-/5Phos/rArArGrUrArGrUrUrUrCrGrUrCrGrUrUrUrCrGrUrArGrUrCrG/3ddC/-3' |                            |
